# Supplementary material
Source: ML conference proceedings conference paper supplement (https://openaccess.thecvf.com/content/CVPR2026/html/Li_Gastric-X_A_Multimodal_CVPR_2026_paper.html)
Supplement: Supplementary file 1 [file Li_Gastric-X_A_Multimodal_CVPR_2026_supplemental.pdf]

# Gastric-X: A Multimodal Multi-Phase Benchmark Dataset for Advancing Vision-Language Models in Gastric Cancer Analysis

(Supplementary File)

## A. Abstract

This supplementary document provides extended technical details and additional discussions for the Gastric-X benchmark. Specifically, we present: (1) a description of the multi-phase CT normalization and alignment pipeline in Sec. B; (2) detailed explanations of the provided clinical reports (CT imaging descriptions, endoscopy reports, and diagnostic conclusions) in Sec. C; (3) a description of the creation, verification, and prompting strategy for all VQA pairs in Sec. D; (4) an illustration of the 134 biomedical indicators in Sec. E.

## B. Multi-phase CT Standardization Details

Multi-phase CT scans encompass substantial variation across patients and acquisition phases. Our preprocessing pipeline aims to harmonize patterns, standardize geometric properties, and ensure spatial alignment across phases.

**Intensity normalization across phases.** We apply a unified clipping window of  $[-100, 300]$  HU, consistent with recommended gastric soft-tissue imaging ranges. For each CT volume, per-volume z-score normalization is performed after clipping. In addition, we use histogram matching across phases to reduce heterogeneity.

**Voxel spacing standardization.** All phases are resampled to isotropic spacing of  $1.0 \times 1.0 \times 1.0 \text{ mm}^3$  using trilinear interpolation for image data.

**Handling different-sized CT slices.** Raw scans contain variable numbers of axial slices. Each patient is associated with a coarse 3D bounding region around the stomach, manually annotated by clinical readers. These bounding boxes vary between

$$256 \times 256 \times 160 \text{ and } 288 \times 288 \times 192$$

depending on patient-specific anatomy. Volumes are cropped or padded to the unified shape:  $288 \times 288 \times 192$ .

**Multi-phase alignment.** Arterial and delayed phases are rigidly registered to the venous phase using a 6-DOF transformation optimized via mutual information. Registration is implemented with SimpleITK (Elastix backend).

**Quality control.** Scans with corrupted slices, missing metadata, or excessive misalignment are excluded. Approximately 3–4% of volumes are filtered by this process.

## C. The Clinical Reports

Each patient record contains three types of clinical reports:

**CT imaging description report.** A detailed morphological description authored by radiologists. It covers wall thickening, ulceration, enhancement patterns, perigastric fat infiltration, lymph node size/morphology, and incidental findings.

**Endoscopy report.** This endoscopy report provides a detailed assessment of the gastrointestinal mucosa, including evaluation of surface texture, ulceration, pit-pattern characteristics, and any other notable structural changes. Lesions are described with explicit documentation of their location, extent, and depth. Biopsy samples, when obtained, are recorded with corresponding anatomical sites to support accurate histologic correlation.

**Diagnostic conclusion report.** A concise interpretive summary presenting the radiologist’s overall impression, including features suggestive of malignancy, estimated TNM staging when applicable, assessment of regional or distant nodal involvement, and any pertinent recommendations for further evaluation or correlation with clinical or pathological findings.

## D. The Creation of VQA Pairs

The dataset contains 26,760 VQA pairs derived from clinical reports. Their creation follows a multi-stage pipeline designed to ensure clinical correctness, semantic grounding, and diversity of reasoning patterns.

**(1) Large-scale candidate generation using multiple LLMs.** Two publicly available large language models, e.g., ChatGPT 4.0, Gemini 2.5 and Claude Sonnet 4.0 were prompted with structured instructions to generate initial question candidates. The prompts targeted clinically meaningful aspects such as lesion characterization, enhancement behavior across phases, staging-relevant findings, anatomical localization, and factual consistency checks. Among all

Table 1. Effectiveness of different prompting strategies for generating clinically valid VQA questions. Validity represents the percentage of Q/A pairs confirmed by both clinicians.

| Prompt Type       | Validity (%) | Remarks                                                |
|-------------------|--------------|--------------------------------------------------------|
| Lesion-focused    | 92.4         | Most clinically reliable and consistently grounded.    |
| Staging-focused   | 88.1         | Dependent on level of staging detail documented.       |
| Enhancement-phase | 84.7         | Sensitive to phase contrast variations.                |
| Localization      | 79.3         | Occasional ambiguity in spatial descriptions.          |
| Yes/No factual    | 90.5         | High factual precision but limited question diversity. |

generated candidates, ChatGPT 4.0 contributed 78.32% of the questions that ultimately passed clinical verification.

**(2) Prompt design and controlled extraction.** To systematically guide generation, we defined five prompt categories: (1) lesion-centric question design, (2) enhancement-phase reasoning, (3) staging-related reasoning, (4) anatomical localization questions, and (5) binary Yes/No factual verification. Each prompt type was designed to reflect reasoning processes typically employed in abdominal radiology. Outputs containing ambiguous phrasing or information not present in the source report were automatically removed.

**(3) Final VQA selection and answer fidelity.** Only Q/A pairs that strictly adhered to source-report evidence were retained. All answers are derived exclusively from the original CT imaging descriptions or diagnostic conclusions, without augmentation using external medical knowledge.

**(4) Double-blind clinical verification.** All candidate Q/A pairs underwent sentence-level verification by two independent clinical experts: a radiologist with seven years of experience and a gastroenterology specialist with ten years of experience. Each clinician evaluated the factual correctness of both the question and its corresponding answer by directly comparing them to the source report. Discrepancies were flagged and resolved through consensus. This process ensures that the final VQA set reflects clinically valid reasoning and avoids hallucinated associations.

**Prompt effectiveness comparison.** We summarize the effectiveness of each prompt category in Table 1, demonstrating that lesion-focused prompts yield the highest clinical validity, while localization prompts exhibit slightly lower consistency due to occasional ambiguity in spatial references.

## E. The Biomedical Indicators

The dataset includes 134 structured biomedical indicators encompassing demographic data, laboratory tests, tumor biomarkers, imaging metadata, surgical information, pathological staging, histological findings, and postoperative outcomes are shown in Table 2. These indicators originate from structured EHR and were processed to ensure consistency across patients.

All sensitive identifiers (including patient names, ID numbers, phone numbers, and hospitalization codes) were removed or replaced with anonymized pseudonyms. Variables unrelated to model training (such as historical comorbidities or unused surgery-related entries), are retained for completeness but marked as not used in this study.

Table 2. Full List of 134 Structured Biomedical Variables in the Gastric-X Dataset. De-identified is marked as "De-ID".

| Item                               | Description                           | Item                           | Description                |
|------------------------------------|---------------------------------------|--------------------------------|----------------------------|
| <b>Demographics</b>                |                                       |                                |                            |
| Hospital ID (De-ID)                | Anonymized hospitalization identifier | Patient Name (De-ID)           | Anonymized patient code    |
| Sex                                | Biological sex                        | Age (De-ID)                    | Age at admission           |
| Bed Number (De-ID)                 | Anonymized bed assignment             | Surgery Date (De-ID)           | Date of surgery (De-ID)    |
| Imaging ID                         | CT imaging identifier                 | CT Description                 | Radiology description      |
| <b>CBC</b>                         |                                       |                                |                            |
| CBC Test Date                      | Date of CBC test                      | CBC White Blood Cell Count     | White blood cell count     |
| CBC Neutrophil Count               | Absolute neutrophil count             | CBC Neutrophil Ratio           | Neutrophil percentage      |
| CBC Lymphocyte Count               | Absolute lymphocyte count             | CBC Lymphocyte Ratio           | Lymphocyte percentage      |
| CBC Hemoglobin                     | Hemoglobin concentration              | CBC Platelet Count             | Platelet count             |
| <b>Biochemistry</b>                |                                       |                                |                            |
| Biochemistry Test Date             | Date of biochemistry test             | Biochemistry Fasting Glucose   | Fasting plasma glucose     |
| Biochemistry Prealbumin            | Serum prealbumin                      | Biochemistry ALT               | Alanine aminotransferase   |
| Biochemistry AST                   | Aspartate aminotransferase            | Biochemistry Total Protein     | Total serum protein        |
| Biochemistry Albumin               | Serum albumin                         | Biochemistry Total Bilirubin   | Total bilirubin            |
| Biochemistry Direct Bilirubin      | Direct bilirubin                      | Biochemistry Creatinine        | Serum creatinine           |
| <b>Tumor Markers</b>               |                                       |                                |                            |
| Biochemistry Urea (BUN)            | Blood urea nitrogen                   | Tumor Markers Test Date        | Date of tumor marker test  |
| Tumor Markers AFP                  | Alpha-fetoprotein                     | Tumor Markers CEA              | Carcinoembryonic antigen   |
| Tumor Markers CA125                | Cancer antigen 125                    | Tumor Markers CA724            | Cancer antigen 724         |
| Tumor Markers CA199                | Cancer antigen 19-9                   | Past Medical History           | Past conditions (not used) |
| <b>Surgery Details</b>             |                                       |                                |                            |
| Surgery Date                       | Date of surgery                       | Resection Range                | Extent of resection        |
| Gastrointestinal Reconstruction    | Postoperative reconstruction type     | Occupation                     | Patient occupation         |
| Education Level                    | Highest educational level             | Marital Status                 | Marital status             |
| Ethnicity                          | Ethnic group                          | Admission Method               | Mode of admission          |
| Insurance Status                   | Insurance coverage                    | ID Number (De-ID)              | Anonymized ID number       |
| <b>Surgical and Admission Info</b> |                                       |                                |                            |
| Contact Number (De-ID)             | Contact phone                         | Surgery Admission Date (De-ID) | Admission date for surgery |
| Surgery Discharge Date (De-ID)     | Discharge date                        | Surgery Hospitalization Cost   | Total hospital cost        |
| Admission Temperature              | Temperature at admission              | Admission Pulse                | Pulse rate at admission    |
| Admission Respiration              | Respiratory rate                      | Admission Systolic Pressure    | Systolic BP                |
| Admission Diastolic Pressure       | Diastolic BP                          | Height                         | Height                     |
| Weight                             | Weight                                | BMI                            | Body mass index            |
| General Condition                  | Performance status                    | Weight Loss                    | Recent weight loss         |
| Reduced Food Intake                | Reduced oral intake                   | Smoking Status                 | Smoking history            |
| Drinking Status                    | Alcohol use                           | Endoscopy Date (De-ID)         | Endoscopy date             |
| Endoscopy Tumor Location           | Tumor location                        | Endoscopy Tumor Size           | Tumor size                 |
| Endoscopy Gross Type               | Gross morphology                      | Endoscopy Biopsy Pathology     | Biopsy pathology           |
| Endoscopy Appearance               | Visual findings                       | Chief Surgeon (De-ID)          | Operating surgeon          |
| <b>Tumor Anatomy and Pathology</b> |                                       |                                |                            |
| Tumor Anatomical Location          | Tumor site                            | Maximum Tumor Diameter         | Maximal diameter           |
| Serosal Invasion                   | Serosal involvement                   | Gross Tumor Type               | Macroscopic type           |
| Linitis Plastica                   | Linitis plastica presence             | Perigastric Lymph Nodes        | Perigastric node status    |
| Liver Metastasis                   | Liver metastasis                      | Adjacent Organ Invasion        | Neighboring organ invasion |
| Peritoneal Seeding                 | Peritoneal metastasis                 | Ascites                        | Ascites presence           |
| Pathology ID (De-ID)               | Specimen ID                           | Tumor Size (Long Axis)         | Long axis size             |
| Tumor Size (Short Axis)            | Short axis size                       | Tumor Size (Height)            | Height                     |
| Histologic Grade                   | Differentiation grade                 | Additional Histologic Type     | Additional components      |
| Distance to Proximal Margin        | Proximal margin distance              | Distance to Distal Margin      | Distal margin distance     |
| Specimen Proximal Margin           | Proximal margin status                | Specimen Distal Margin         | Distal margin status       |
| Perineural Invasion                | Perineural invasion                   | Vascular Cancer Thrombus       | Vascular invasion          |
| <b>Staging and Lymph Nodes</b>     |                                       |                                |                            |
| T Stage                            | Pathologic T category                 | N Stage                        | Pathologic N category      |
| M Stage                            | Pathologic M category                 | Overall Stage                  | Final stage                |
| Positive Lymph Nodes               | Count of positive nodes               | Dissected Lymph Nodes          | Total dissected nodes      |
| <b>Molecular and IHC</b>           |                                       |                                |                            |
| Ki-67                              | Proliferation index                   | HER2 Status                    | HER2 expression            |

Continued on next page

| Item                              | Description          | Item                           | Description            |
|-----------------------------------|----------------------|--------------------------------|------------------------|
| CLDN Status                       | Claudin status       | MLH1                           | MLH1 expression        |
| PMS2                              | PMS2 expression      | MSH2                           | MSH2 expression        |
| MSH6                              | MSH6 expression      | EBER                           | EBV RNA (ISH)          |
| PD-L1 Score                       | PD-L1 score          | MMR Status                     | Mismatch repair status |
| <b>Complications and Outcomes</b> |                      |                                |                        |
| Complication Severity             | Clavien–Dindo grade  | Secondary Surgery              | Reoperation            |
| Complication Occurrence           | Any complication     | Severe Complication Occurrence | Severe complication    |
| Total Hospital Stay               | Total days           | Postoperative Stay             | Days after surgery     |
| Postoperative Fever               | Fever occurrence     | Fever Days                     | Number of fever days   |
| Complication Category             | Type of complication | Intervention                   | Treatment measures     |
| Complication Notes                | Additional notes     |                                |                        |
